# Supplementary material for: A theoretic insight into the catalytic activity promotion of CeO2 surfaces by Mn doping
Source: Royal Society of Chemistry journal article supplement (doi:10.1039/c2cp00061j), 2012-01-01
Supplement: c2cp00061j.pdf [file c2cp00061j.pdf]

# **A theoretic insight on catalytic activity promotion of CeO<sub>2</sub> surface by Mn doping**

Wanglai Cen, Yue Liu\*, Zhongbiao Wu\*, Haiqiang Wang, Xiaole Weng

*Department of Environmental Engineering, Zhejiang University, Hangzhou 310058, China*

E-mail: yueliu@zju.edu.cn (Y. Liu); zbwu@zju.edu.cn (Z. B. Wu)

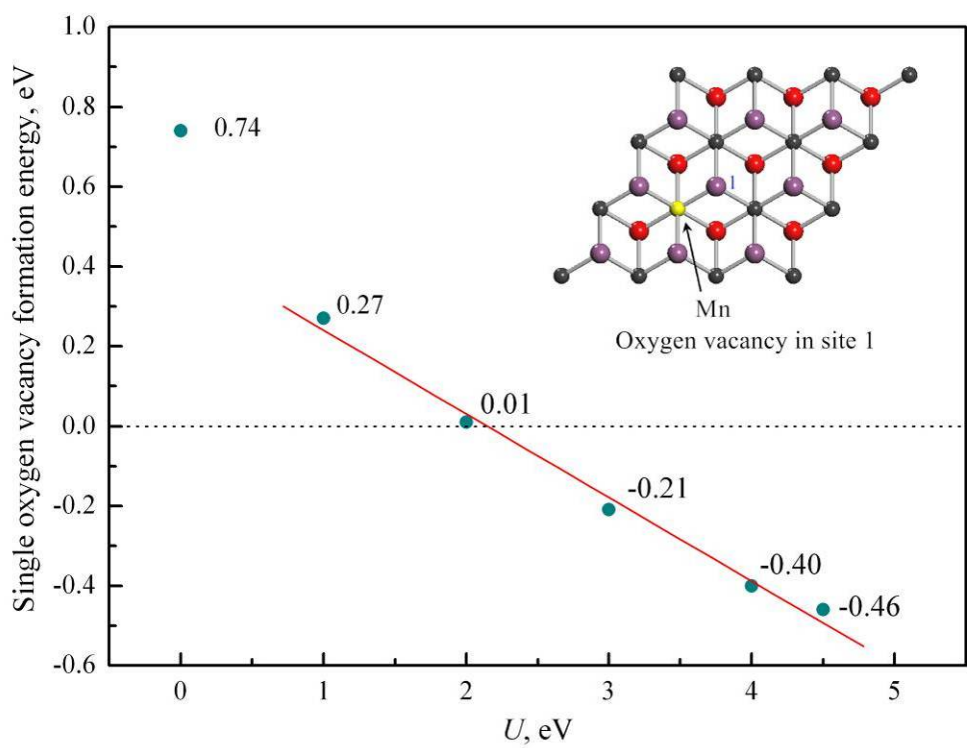

Fig. S1 Single oxygen vacancy formation energy for  $U = 0 \sim 4.5$  eV. The formation energies were labeled with aside the data points. Inset: oxygen vacancy site in MnCe labeled 1.

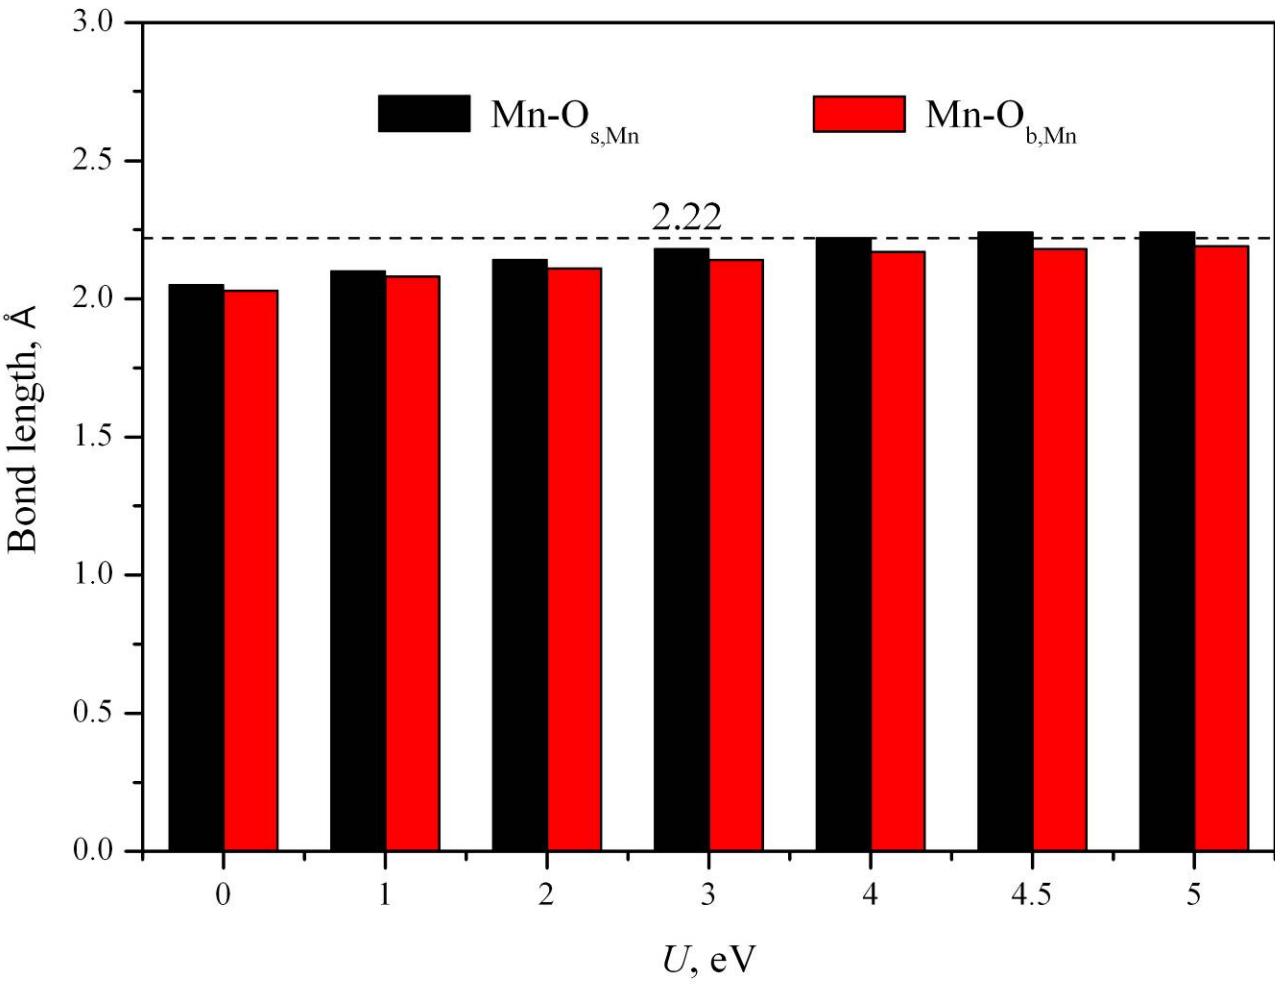

Fig. S2 Selected Mn-O bond lengths in vMnCe with oxygen vacancy in site 1.

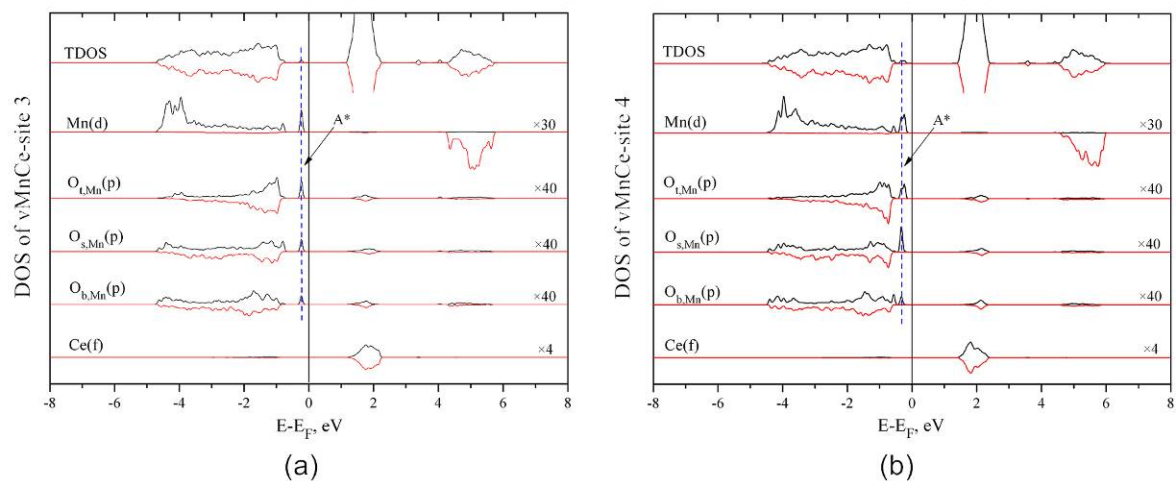

Fig. S3 Total and partial DOS of vMnCe with oxygen vacancy in site 3 and 4. The blue dashed lines labeled as A\* are Mn 3d-O 2p gap states acting as electrons buffer instead of Ce 4f. Fermi level is set to be zero point.

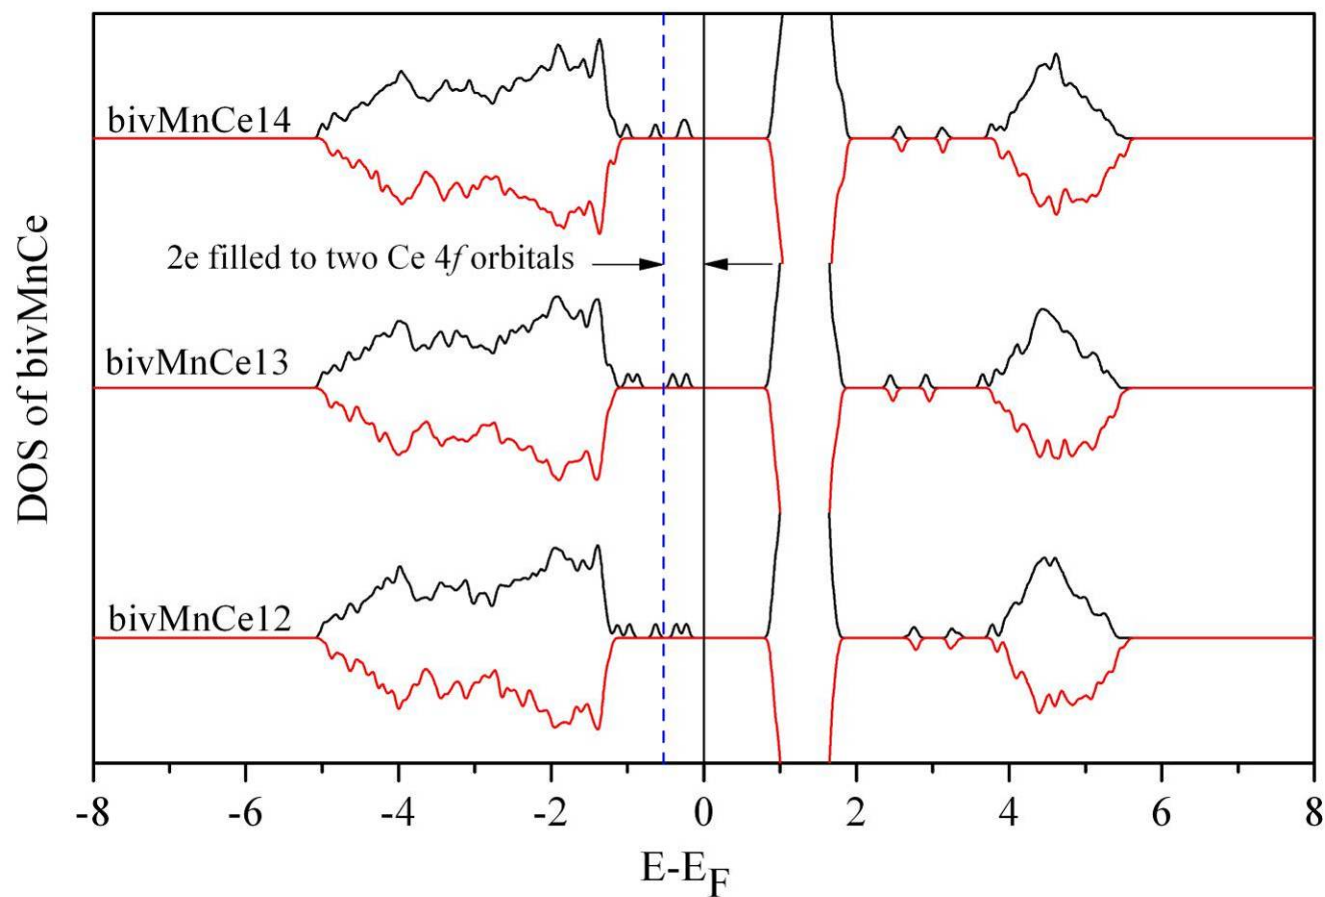

Fig. S4 DOS of bivMnCe with two oxygen vacancies at sites 1-2, 1-3 and 1-4. All the populations of the occupied Ce 4f states are 2 e by DOS integration.

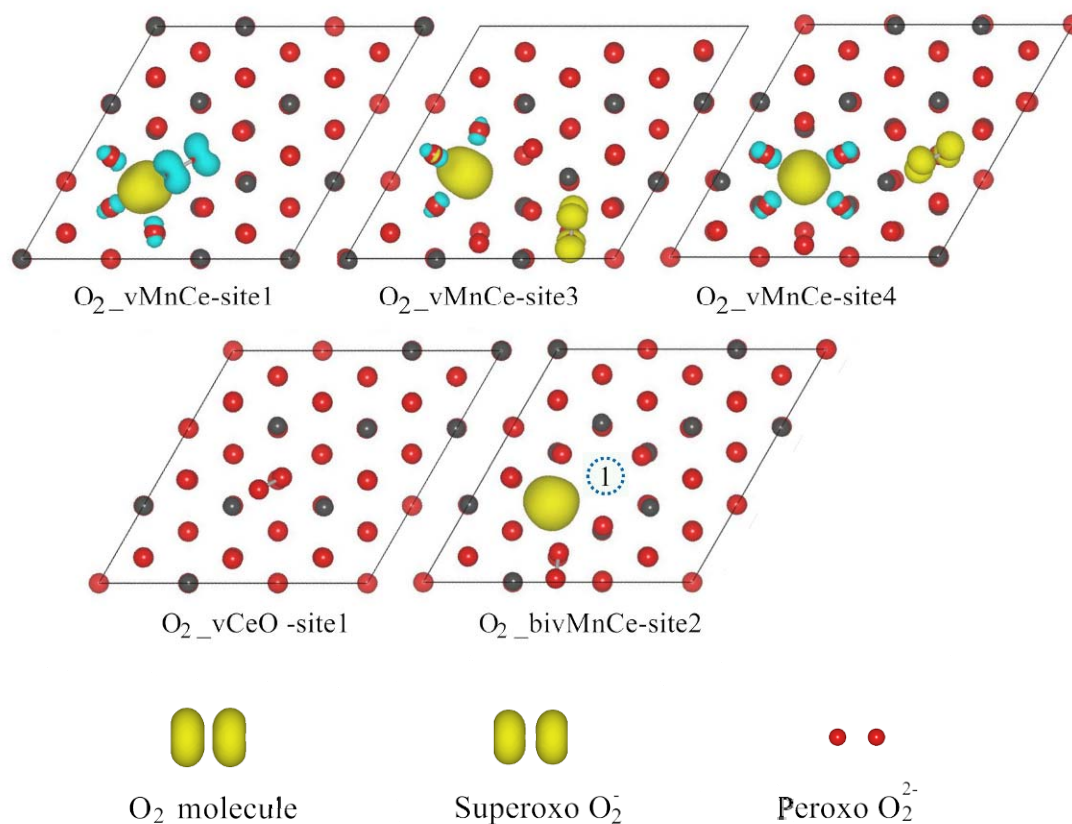

Fig. S5 Spin charge density of:  $\text{O}_2$ \_vMnCe with  $\text{O}_2$  molecule adsorbed at oxygen vacancy site 1, 3 and 4,  $\text{O}_2$ \_vCeO<sub>2</sub> at site 1,  $\text{O}_2$ \_bivMnCe at site 2, free  $\text{O}_2$  molecule, superoxo  $\text{O}_2^-$ , and peroxo  $\text{O}_2^{2-}$ . The isovalue is  $0.05 \text{ e}/\text{\AA}^3$ . The *p*-like spin-polarized charge density distribution of the adsorbed  $\text{O}_2$  on vMnCe indicates  $\text{O}_2^-$  specie. The spin-unpolarized charge density distribution of the adsorbed  $\text{O}_2$  on bivMnCe and vCeO<sub>2</sub> indicates  $\text{O}_2^{2-}$  specie.

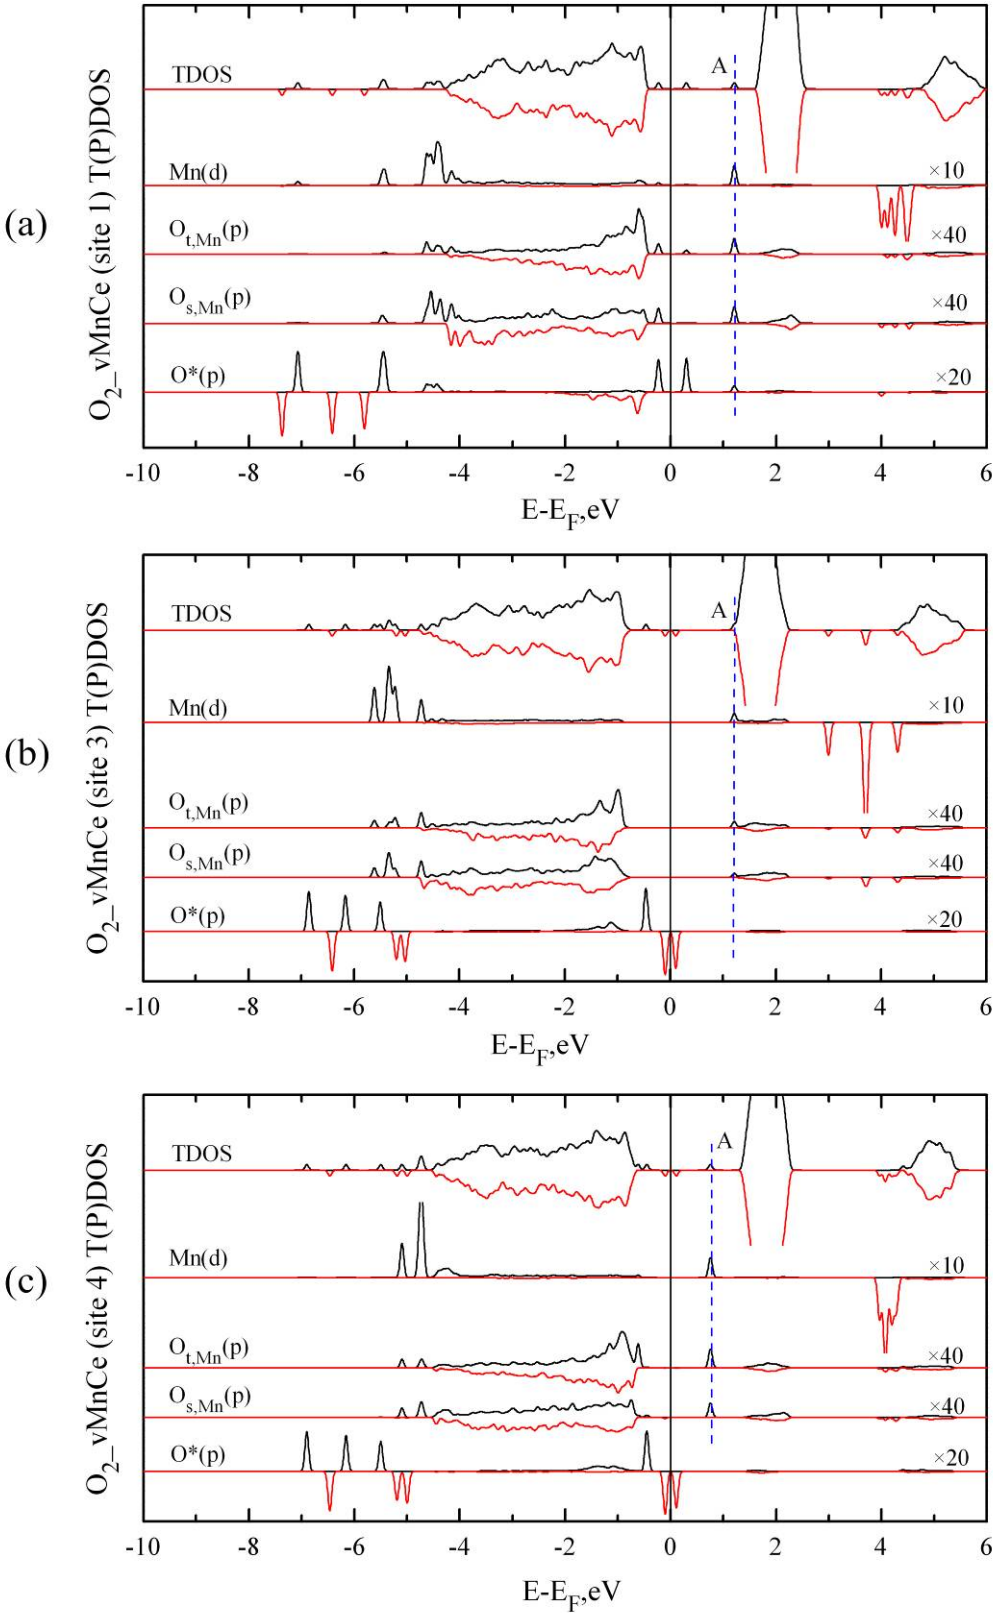

Fig. S6 DOS of  $O_2$ -vMnCe with oxygen molecule adsorbed on different vacancy sites. Mn 3d-O 2p gap state is marked by the dashed line A.

Table S1 Population with different Wigner Seitz radiuses for MnCe and vMnCe at  $U = 4.5$  eV for Mn  $3d$ .

| Items                                                                                                   | vMnCe                |                | MnCe    |       |
|---------------------------------------------------------------------------------------------------------|----------------------|----------------|---------|-------|
|                                                                                                         | default <sup>c</sup> | 1 <sup>d</sup> | default | 1     |
| Wigner Seitz radius, Å                                                                                  |                      |                |         |       |
| Mn $3d$ in VB, e                                                                                        | 4.73                 | 4.29           | 4.45    | 4.07  |
| Mn $3d$ -O $2p$ gap state in PDOS, e                                                                    |                      |                |         |       |
| O <sub>t,Mn</sub> $2p$                                                                                  | 0.167                | 0.185          | 0.194   | 0.214 |
| O <sub>s,Mn</sub> $2p$                                                                                  | 0.171                | 0.187          | 0.133   | 0.145 |
| O <sub>b,Mn</sub> $2p$                                                                                  | 0.108                | 0.118          | -       | -     |
| (O <sub>t,Mn</sub> + O <sub>s,Mn</sub> ) $\times 3$ <sup>a</sup>                                        | -                    | -              | 0.981   | 1.077 |
| O <sub>b,Mn</sub> $2p$ + O <sub>t,Mn</sub> $2p \times 2$ + O <sub>s,Mn</sub> $2p \times 3$ <sup>b</sup> | 0.955                | 1.049          | -       | -     |
| Mn $3d$                                                                                                 | 0.383                | 0.373          | 0.317   | 0.311 |
| Sum                                                                                                     | 1.338                | 1.422          | 1.298   | 1.388 |
| Mn $3d$ -O $2p$ gap state in TDOS, e                                                                    | 1.999                | 1.999          | 1.999   | 2.000 |

a: the MnCe slab is in  $C_{3v}$  symmetry, so there are three equivalent atoms each of the O<sub>t,Mn</sub> and O<sub>s,Mn</sub> atoms;  
b: there are one O<sub>b,Mn</sub> atom, two O<sub>t,Mn</sub> atoms and three O<sub>s,Mn</sub> atoms as shown in Fig. 1a and b.  
c: all the radiuses are employed as default in the pseudopotential files: Mn 1.323 Å, Ce 1.323 Å, O 0.820 Å.  
d: all the radiuses for Ce, Mn and O atoms are set to be 1 Å.

Table S2 Calculated properties of adsorbed O<sub>2</sub> and Mn in O<sub>2</sub>-vMnCe

| Adsorption site | Bond length, Å | Stretching frequency, cm <sup>-1</sup> | Magnetic moment, $\mu_B$    |      |             |
|-----------------|----------------|----------------------------------------|-----------------------------|------|-------------|
|                 |                |                                        | O <sub>2</sub> <sup>*</sup> | Mn   | Mn in vMnCe |
| 1               | 1.32           | 1134                                   | -1.04                       | 4.09 | 4.70        |
| 3               | 1.35           | 1119                                   | 0.92                        | 3.90 | 4.71        |
| 4               | 1.34           | 1119                                   | 0.93                        | 4.12 | 4.72        |
